# Supplementary material for: Analysis of the complement and molecular evolution of tRNA genes in cow
Source: PubMed Central journal article supplement (PMC2680898; doi:10.1186/1471-2164-10-188), 2009-04-24

|                        |                              |                      |                           |           |              |              |                              |              |                            |         |                        |                       |
|------------------------|------------------------------|----------------------|---------------------------|-----------|--------------|--------------|------------------------------|--------------|----------------------------|---------|------------------------|-----------------------|
| BTA2.tna1251-GlyGCC    | - - - GGAACAACACTTACAGGAAAGA | GCATTGGTGGTTCAGTGGT  | - AGAATTCTCGCCGCCACGCGGGA | GGCCC     | GGGTTTCGATTC | CCCGGC       | CAATGCAATG-TGATGTTTTCCTTTTG- |              |                            |         |                        |                       |
| BTA3.tna312-GlyTCC     | - - GCGGCCGCCCGGGCTGTGTA-    | GC GTTGGTGGTATAGTGGT | GAGCATAAGCTGCCTTCCA       | AGCAGTTGA | CCC          | GGGTTTCGATTC | CCCGGC                       | CAACGCA      | GCGGGCCGACCTTTTGCTGA-      |         |                        |                       |
| BTA3.tna315-GlyTCC     | - - GAGGCCGCCCGGGCTGTGTA-    | GC GTTGGTGGTATAGTGGT | GAGCATAAGCTGCCTTCCA       | AGCAGTTGA | CCC          | GGGTTTCGATTC | CCCGGC                       | CAACGCA      | GCGGGCCGACCTTTTGCTGA-      |         |                        |                       |
| BTA3.tna321-GlyTCC     | TCGAAA - - - AGTTTGCTAAGCAG  | GC GTTGGTGGTATAGTGGT | GAGCATAAGCTGCCTTCCA       | AGCAGTTGA | CCC          | GGGTTTCGATTC | CCCGGC                       | CAACGCA      | GGGAACTTTTCCCTCTTTC-       |         |                        |                       |
| BTA3.tna327-GlyTCC     | - - GAGGCCGCCCGGGCTGTGTA-    | GC GTTGGTGGTATAGTGGT | GAGCATAAGCTGCCTTCCA       | AGCAGTTGA | CCC          | GGGTTTCGATTC | CCCGGC                       | CAACGCA      | GCGGGCCGACCTTTTGCTGA-      |         |                        |                       |
| BTA3.tna719-GlyCCC     | - - - AAAATGTTGCTTGTGGCAAA   | GCATTGGTGGTTCAGTGGT  | - AGAATTCTCGCCTC          | CCA       | CGTGGGA      | GA           | CCC                          | GGGTTTCGATTC | CCCGGC                     | CAATGCA | TAGTGCCCAAGTACTTTTCT-  |                       |
| BTA3.tna819-GlyCCC     | - - - TGCACCTTCTCTCTATGGTG   | GCATTGGTGGTTCAGTGGT  | - AGAATTCTCGCCTC          | CCA       | CGCGGGA      | GA           | CCC                          | GGGTTTCGATTC | CCCGGC                     | CAGTGCA | TTG-TGGTTATGTTTGTTTTG- |                       |
| BTA3.tna7857-GlyTCC    | - AGCGGTTTTTGCTTCTGTGT - -   | GC GTTGGTGGTATAGTGGT | GAGCATAAGCTGCCTTCCA       | AGCAGTTGA | CCC          | GGGTTTCGATTC | CCCGGC                       | CAACGCA      | GT - - GCCTATCTTTTCACTCTGC |         |                        |                       |
| BTA3.tna7881-GlyCCC    | - - - CAAATATGCTCTCTATAGTG   | GCATTGGTGGTTCAGTGGT  | - AGAATTCTCGCCTC          | CCA       | CGCAGGA      | GA           | CCC                          | GGGTTTCGATTC | CCCGGC                     | CAATGCA | TTG-TTGTTGTGTTGGTTTTG- |                       |
| BTA3.tna8323-GlyGCC    | - - - GGGCGGCATTGGCCATCGGT   | GCATGGGTGGTTCAGTGGT  | - AGAATTCTCGCCTG          | CCA       | CGCGGGA      | GG           | CCC                          | GGGTTTCGATTC | CCCGGC                     | CATGCA  | GCCGCAGCGTCCCTTTTGG-   |                       |
| BTA3.tna8325-GlyGCC    | - - - GAAGCTTTATCACGGAAGTA   | GCATTGGTGGTTCAGTGGT  | - AGAATTCTCGCCTG          | CCA       | CGCGGGA      | GG           | CCC                          | GGGTTTCGATTC | CCCGGC                     | CAATGCA | TCC-TGCTCTTTTCTTTCAGG- |                       |
| BTA3.tna8327-GlyGCC    | - - - GGGCGGGGTTGGCCATCGGT   | GCATGGGTGGTTCAGTGGT  | - AGAATTCTCGCCTG          | CCA       | CGCGGGA      | GG           | CCC                          | GGGTTTCGATTC | CCCGGC                     | CATGCA  | GCCGCAGCGTCCCTTTTGG-   |                       |
| BTA7.tna6956-GlyTCC    | AGA AACCCCTCACTTACTGGG- - -  | GC GTTGGTGGTATAGTGGT | TAGCATAAGCTGCCTTCCA       | AGCAGTTGA | CCC          | GGGTTTCGATTC | CCCGGC                       | CAACGCA      | AGGGTTGCTTTTCTTTT-         |         |                        |                       |
| BTA11.tna5955-GlyCCC   | - - - GGCAGAACCAGCTTCCGTGA   | GCGCCGCTGGTGTAGTGGT  | - ATCATGCAAGATTCC         | CA        | TTCTTGC      | GA           | CCC                          | GGGTTTCGATTC | CCCGGC                     | GGC     | GCA                    | CACCGTTTTTGTCCCGCCTT- |
| BTA18.tna15-GlyGCC     | - - - AGGAGGAGTGCTCAGCTGGA   | GCATTGGTGGTTCAGTGGT  | - AGAATTCTCGCCTG          | CCA       | CGCGGGA      | GG           | CCC                          | GGGTTTCGATTC | CCCGGC                     | CAATGCA | GCTCCCTTAACCTTTTGTAC-  |                       |
| BTA18.tna25-GlyGCC     | - - - TCAAAAGGGCCTCCGCTGAG   | GCATTGGTGGTTCAGTGGT  | - AGAATTCTCGCCTG          | CCA       | CGCGGGA      | GG           | CCC                          | GGGTTTCGATTC | CCCGGC                     | CAATGCA | GAAAGCTGACTGTTTCTTT-   |                       |
| BTA18.tna5772-GlyGCC   | - - - GTGAACCAAGAGAGCAGCGGA  | GCATTGGTGGTTCAGTGGT  | - AGAATTCTCGCCTG          | CCA       | CGCGGGA      | GG           | CCC                          | GGGTTTCGATTC | CCCGGC                     | CAATGCA | GGGCTGGTTTTTGGCCTCT-   |                       |
| BTA18.tna5773-GlyGCC   | - - - CACAGCTGCTGACAGCTGGA   | GCATTGGTGGTTCAGTGGT  | - AGAATTCTCGCCTG          | CCA       | CGCGGGA      | GG           | CCC                          | GGGTTTCGATTC | CCCGGC                     | CAATGCA | GAGCAAACATTTTTTTTTT-   |                       |
| BTA19.tna1389-GlyGCC   | - - - GGAGATTTCAAGGTACGCTT   | GCATTGGTGGTTCAGTGGT  | - AGAATTCTCGCCTG          | CCA       | CGCGGGA      | GG           | CCC                          | GGGTTTCGATTC | CCCGGC                     | CAATGCA | TCCGTTGTTTTTTTTTTTTT   |                       |
| BTA19.tna1396-GlyTCC   | - - GAATCCCAGTATAATGCG- AA   | GC GTTGGTGGTATAGTGGT | GAGCATAAGCTGCCTTCCA       | AGCAGTTGA | CCC          | GGGTTTCGATTC | CCCGGC                       | CAACGCA      | AGGTTATTTTCTCTTTGCT-       |         |                        |                       |
| BTA23.tna3205-GlyGCC   | - - - AGAACGGTGAACCTCGTCGAG  | GCATTGGTGGTTCAGTGGT  | - AGAATTCTCGCCTG          | CCA       | CGCGGGA      | GG           | CCC                          | GGGTTTCGATTC | CCCGGC                     | CAATGCA | TCAAGATTACGTTTTTCCA-   |                       |
| BTA23.tna3296-GlyGCC   | - - - AGCAAAACCAGATGATACAA   | GCATTGGTGGTTCAGTGGT  | - AGAATTCTCGCCTG          | CCA       | CGCGGGA      | GG           | CCC                          | GGGTTTCGATTC | CCCGGC                     | CAATGCA | AAG-TGTTTTCTGTTTTTCTT- |                       |
| BTAUn.350.tna16-GlyCCC | - - - CAAATATGCTCTCTATAGTG   | GCATTGGTGGTTCAGTGGT  | - AGAATTCTCGCCTC          | CCA       | CGCAGGA      | GA           | CCC                          | GGGTTTCGATTC | CCCGGC                     | CAATGCA | TTG-TTGTTGTGTTGGTTTTG- |                       |
| BTAUn.350.tna32-GlyCCC | - - - CAAATATGCTCTCTATAGTG   | GCATTGGTGGTTCAGTGGT  | - AGAATTCTCGCCTC          | CCA       | CGCAGGA      | GA           | CCC                          | GGGTTTCGATTC | CCCGGC                     | CAATGCA | TTG-TTGTTGTGTTTGTTTTG- |                       |
| BTAUn.415.tna4-GlyCCC  | - - - GTCCACCGTAAAAAACCAAG   | GCATTGGTGGTTCAGTGGT  | - AGAATTCTCGCCTC          | CCA       | CGCGGGA      | GA           | CCC                          | GGGTTTCGATTC | CCCGGC                     | CAATGCA | TATGTCTTTTGGTCGGCTCT-  |                       |
| BTAUn.415.tna13-GlyCCC | - - - TGCACCTTCTCTCTATGGTG   | GCATTGGTGGTTCAGTGGT  | - AGAATTCTCGCCTC          | CCA       | CGCGGGA      | GA           | CCC                          | GGGTTTCGATTC | CCCGGC                     | CAGTGCA | TTG-TGGTTATGTTTGTTTTG- |                       |
| BTAUn.415.tna21-GlyCCC | - - - CAAATATGCTCTCTATAGTG   | GCATTGGTGGTTCAGTGGT  | - AGAATTCTCGCCTC          | CCA       | CGCAGGA      | GA           | CCC                          | GGGTTTCGATTC | CCCGGC                     | CAATGCA | TTG-TTGTTGTGTTTGTTTTG- |                       |
| BTAUn.415.tna27-GlyCCC | - - CAGAACGTCAAACG- AGCGGG   | GCATTGGTGGTTCAGTGGT  | - AGAATTCTCGCCTC          | CCA       | CGCGGGA      | GA           | CCC                          | GGGTTTCGATTC | CCCGGC                     | CAATGCA | TCGTGCTCATGTTACTTTT-   |                       |
| BTAUn.851.tna2-GlyGCC  | - - - GGGCGGGGTTGGCCATCGGT   | GCATGGGTGGTTCAGTGGT  | - AGAATTCTCGCCTG          | CCA       | CGCGGGA      | GG           | CCC                          | GGGTTTCGATTC | CCCGGC                     | CATGCA  | GCCGCAGCGTCCCTTTTGG-   |                       |
| BTAUn.851.tna17-GlyTCC | - - GCGGCCGCCCGGGCTGTGTA-    | GC GTTGGTGGTATAGTGGT | GAGCATAAGCTGCCTTCCA       | AGCAGTTGA | CCC          | GGGTTTCGATTC | CCCGGC                       | CAACGCA      | GCGGGCCGACCTTTTGCTGA-      |         |                        |                       |
| BTAUn.411.tna10-GlyCCC | - - - CAAATATGCTCTCTATAGTG   | GCATTGGTGGTTCAGTGGT  | - AGAATTCTCGCCTC          | CCA       | CGCAGGA      | GA           | CCC                          | GGGTTTCGATTC | CCCGGC                     | CAATGCA | TTG-TTGTTGTGTTTGTTTTG- |                       |
| BTAUn.5294.tna1-GlyTCC | TCGAAA - - - AGTTTGCTAAGCAG  | GC GTTGGTGGTATAGTGGT | GAGCATAAGCTGCCTTCCA       | AGCAGTTGA | CCC          | GGGTTTCGATTC | CCCGGC                       | CAACGCA      | GGGAACTTTTCCCTCTTTC-       |         |                        |                       |

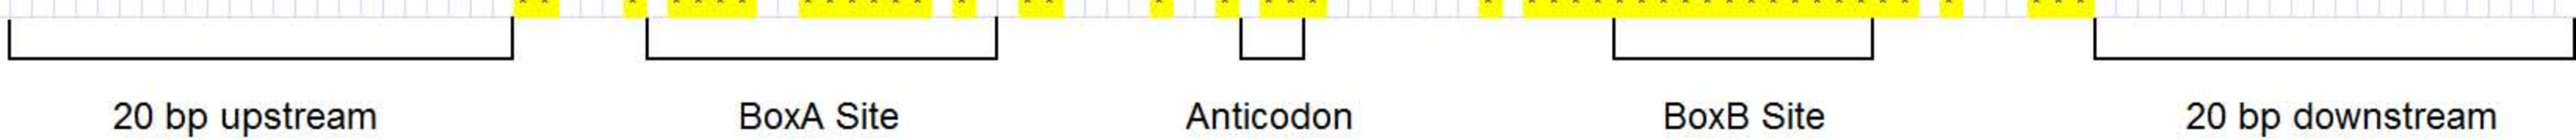

Supplement: 1471-2164-10-188-S6.pdf [file 1471-2164-10-188-S6.pdf]
